# Supplementary material for: Systematic computation with functional gene-sets among leukemic and hematopoietic stem cells reveals a favorable prognostic signature for acute myeloid leukemia
Source: PubMed Central journal article supplement (PMC4376348; doi:10.1186/s12859-015-0510-7), 2015-03-24
Supplement: 12859_2015_510_MOESM3_ESM.pdf [file 12859_2015_510_MOESM3_ESM.pdf]

# Vignette: Systematic computation with functional gene-sets among leukemic and hematopoietic stem cells reveals a favorable prognostic signature for acute myeloid leukemia

*Bin Wang, Xinan Yang*

*Thursday, January 08, 2015*

This Vignette includes R source codes to run the FAIME.5 algorithm using demo data.

We introduce the function `rungene2pathway` which is an improved tool for the Functionally Analyzing Individualized Microarray and next generation sequencing data (FAIME) by taking into account of previously defined gene-sets. It compares the cumulative quantitative effects of genes inside an ontology (set of functionally related genes) with those outside, thus overcoming a number of difficulties in prior gene-set enrichment methods [1].

## R source code

The input of the function `rungene2pathway`:

- **dat**: A data frame or matrix of gene expression measurements. The rows of `dat` correspond to genes, and the columns correspond to samples. Note that official gene symbols must label the rows, and the values contained in `dat` should be either finite or NA.
- **gsmmap**: A list or an R `GSA.genesets` object to define gene-set. Users can call the `GSA.read.gmt` function in the R package **GSA** to load customized gene-sets with a `.gmt` format.
- **alpha**: A positive integer, 5 by default. A higher value puts more weights on the most highly-valued ranks than the lower-valued ranks.
- **logCheck**: A Boolean value, FALSE by default. When being TRUE, the function takes the log-transformed values of all values in `dat` when any value is larger than 20.
- **na.rm**: A Boolean value indicates whether to keep missing values when the parameter `method="FAIME"`. By default, it is FALSE.

Below are the R scripts for the function `rungene2pathway` which calls the internal function `FAIME`:

```
rungene2pathway <- function(dat,gsmmap,alpha=5,logCheck=FALSE,method=c("FAIME"),na.rm=FALSE){
  if(missing(method)){method="FAIME"}
  if(missing(alpha)){alpha=5}
  if(missing(na.rm)){na.rm=FALSE}
  if(missing(logCheck)){logCheck=FALSE}
  if(is.data.frame(dat)==FALSE & is.matrix(dat)==FALSE){
    stop("Error: input should be a data frame or a matrix")}

  if(class(gsmmap=="GSA.genesets"){
    seeds <- gsmmap$geneset.names
    res <- matrix(nrow=length(seeds), ncol=ncol(dat))
    for(i in 1:length(seeds)){
      for(j in 1:ncol(dat)){
        res[i,j] <- FAIME(sampleExp=dat[,j], GeneID=toupper(rownames(dat)),
                          Geneset=toupper(gsmmap$genesets[[i]]),
```

```

                                alpha=alpha, logCheck=logCheck,na.rm=na.rm)
    }#j loop
  }#i loop
}else if(class(gsmmap)=="list"){
  if(is.null(names(gsmmap))){stop ("please give the names of gsmmap as a list")}
  seeds <- names(gsmmap)
  res <- matrix(nrow=length(seeds), ncol=ncol(dat))
  for(i in 1:length(seeds)){
    for(j in 1:ncol(dat)){
      res[i,j] <- FAIME(sampleExp=dat[,j],GeneID=toupper(rownames(dat)),
                        Geneset= toupper(gsmmap[[i]]), alpha=alpha,
                        logCheck=logCheck,na.rm=na.rm)

      }#j loop
    }#i loop
  }#class loop

  rownames(res) <- seeds
  colnames(res) <- c(paste(colnames(dat),"2pathscore",sep=""))
  print("gene2pathay calculates score..... done")
  return(res)
}

FAIME <- function(sampleExp, GeneID, Geneset, alpha, logCheck,na.rm){
  if(class(sampleExp)!="numeric"){sampleExp <-as.numeric(levels(sampleExp))[sampleExp]}
  if(logCheck){if(max(sampleExp, na.rm=TRUE) > 20) {sampleExp <- log2(sampleExp)}}
  if(length(sampleExp)!=length(GeneID)){
    stop("Error: GeneID information is missing or not correct!")}

  N <- length(GeneID)
  GeneID_NaInSet <- GeneID[which(!GeneID %in% Geneset)]

  #Step 1: Calculation of weighted rank of gene expression
  rankedExp <- rank(sampleExp, na.last="keep")
  rankscore <- rankedExp*exp((rankedExp/N*alpha)-alpha)

  #Step 2:
  x1 <- which(GeneID %in% Geneset)
  x2 <- which(GeneID %in% GeneID_NaInSet)

  ST <- sum(rankscore[x1], na.rm=TRUE)/length(x1)
  SN <- sum(rankscore[x2], na.rm=TRUE)/length(x2)
  y <- sum(ST, -SN, na.rm=na.rm)

  return(y)
}

```

## Example

**Step 1.** Get gene expression data “leukemia” from the R package GSVA.

A filtering of probesets with the lowest IQR is performed in the demo to save running time but not necessary.

```

library(GSEABase)
library(GSVAdata)
library(genefilter)
library(GSVA)
data(leukemia)
dim(leukemia_eset)
## Features Samples
## 12626 37
filtered_eset <- nsFilter(leukemia_eset, require.entrez=TRUE, remove.dupEntrez=TRUE,
                          var.func=IQR, var.filter=TRUE, var.cutoff=0.5, filterByQuantile=TRUE,
                          feature.exclude="~AFFX")
leukemia_filtered_eset <- filtered_eset$eset
dat_exp<-as.data.frame(exprs(leukemia_filtered_eset))
dim(dat_exp)
## [1] 4318 37
head(dat_exp)
## CL2001011101AA.CEL CL2001011102AA.CEL CL2001011104AA.CEL
## 907_at 11.857516 11.161085 11.512466
## 35430_at 10.328026 9.494069 9.012711
## 36841_at 9.591560 9.820928 9.347952
## 38924_s_at 12.417347 11.706729 12.392675
## 36023_at 11.013613 12.619952 11.175109
## 191_at 9.488507 9.775179 9.439493
## CL2001011105AA.CEL CL2001011109AA.CEL CL2001011110AA.CEL
## 907_at 10.185201 12.231562 11.918172
## 35430_at 10.282458 8.202723 8.241378
## 36841_at 9.616633 10.134252 10.088614
## 38924_s_at 12.842632 11.245247 11.656117
## 36023_at 11.971174 9.980090 9.438358
## 191_at 9.595062 9.429010 9.625638
## CL2001011111AA.CEL CL2001011112AA.CEL CL2001011113AA.CEL
## 907_at 11.491475 12.213642 11.793422
## 35430_at 8.255273 9.090225 8.816643
## 36841_at 9.605967 9.503621 9.528071
## 38924_s_at 11.804745 12.108045 11.824156
## 36023_at 10.438486 9.971472 10.924746
## 191_at 9.511813 9.418150 9.424093
## CL2001011114AA.CEL CL2001011116AA.CEL CL2001011118AA.CEL
## 907_at 11.084444 11.726246 11.798460
## 35430_at 9.897831 8.501331 8.281598
## 36841_at 9.462195 9.559597 9.403876
## 38924_s_at 11.808983 11.275397 11.587586
## 36023_at 11.235509 10.536676 10.410933
## 191_at 9.486785 9.569882 9.882518
## CL2001011120AA.CEL CL2001011121AA.CEL CL2001011122AA.CEL
## 907_at 12.321334 11.788719 12.197492
## 35430_at 8.511181 9.343495 9.058465
## 36841_at 9.855197 9.523719 9.352326
## 38924_s_at 11.436977 12.212075 11.871556
## 36023_at 10.514632 11.047266 10.608633
## 191_at 9.850949 9.635322 9.731658
## CL2001011134AA.CEL CL2001011150AA.CEL CL2001011151AA.CEL
## 907_at 11.667078 11.444946 11.689310

```

|               |                    |                    |                    |
|---------------|--------------------|--------------------|--------------------|
| ## 35430_at   | 9.123565           | 10.020491          | 9.642977           |
| ## 36841_at   | 9.505989           | 9.120245           | 9.470750           |
| ## 38924_s_at | 12.568188          | 12.280862          | 12.007505          |
| ## 36023_at   | 10.818542          | 10.823133          | 10.388536          |
| ## 191_at     | 9.499381           | 9.360173           | 9.344782           |
| ##            | CL2001011153AA.CEL | CL2001011154AA.CEL | CL2001011126AA.CEL |
| ## 907_at     | 11.636323          | 10.638600          | 11.357611          |
| ## 35430_at   | 10.258735          | 8.813048           | 8.923003           |
| ## 36841_at   | 9.281449           | 9.627975           | 9.858323           |
| ## 38924_s_at | 12.256351          | 10.903222          | 12.076050          |
| ## 36023_at   | 11.514675          | 10.341163          | 10.637183          |
| ## 191_at     | 9.592377           | 9.469548           | 9.343042           |
| ##            | CL2001011127AA.CEL | CL2001011128AA.CEL | CL2001011129AA.CEL |
| ## 907_at     | 12.006894          | 11.836165          | 11.551714          |
| ## 35430_at   | 8.035410           | 8.278299           | 9.024235           |
| ## 36841_at   | 9.787795           | 10.185504          | 9.715688           |
| ## 38924_s_at | 12.110634          | 11.968350          | 11.399876          |
| ## 36023_at   | 11.538635          | 10.692843          | 10.486363          |
| ## 191_at     | 9.356517           | 9.335555           | 9.927592           |
| ##            | CL2001011130AA.CEL | CL2001011131AA.CEL | CL2001011132AA.CEL |
| ## 907_at     | 10.741771          | 12.049258          | 12.156861          |
| ## 35430_at   | 10.003668          | 7.965007           | 7.655641           |
| ## 36841_at   | 9.225892           | 10.005552          | 9.934143           |
| ## 38924_s_at | 12.481346          | 11.444596          | 11.304336          |
| ## 36023_at   | 11.170412          | 10.549629          | 10.284485          |
| ## 191_at     | 9.711779           | 9.580291           | 9.638747           |
| ##            | CL2001011133AA.CEL | CL2001011138AA.CEL | CL2001011139AA.CEL |
| ## 907_at     | 10.402571          | 11.857256          | 9.698532           |
| ## 35430_at   | 7.778797           | 9.111072           | 8.952164           |
| ## 36841_at   | 9.874878           | 9.233652           | 9.307411           |
| ## 38924_s_at | 11.644874          | 12.645314          | 11.646653          |
| ## 36023_at   | 11.141781          | 11.342956          | 10.809038          |
| ## 191_at     | 9.849557           | 9.454219           | 9.854332           |
| ##            | CL2001011140AA.CEL | CL2001011142AA.CEL | CL2001011143AA.CEL |
| ## 907_at     | 10.663037          | 11.594571          | 10.930493          |
| ## 35430_at   | 7.563916           | 8.061963           | 8.315588           |
| ## 36841_at   | 10.114030          | 9.757547           | 9.870069           |
| ## 38924_s_at | 10.970311          | 11.241144          | 11.443139          |
| ## 36023_at   | 11.968539          | 10.211034          | 10.382740          |
| ## 191_at     | 9.946538           | 9.979112           | 9.748915           |
| ##            | CL2001011144AA.CEL | CL2001011146AA.CEL | CL2001011149AA.CEL |
| ## 907_at     | 10.284027          | 11.914410          | 12.013266          |
| ## 35430_at   | 9.540942           | 8.591968           | 8.836134           |
| ## 36841_at   | 9.600789           | 10.172181          | 9.457279           |
| ## 38924_s_at | 12.063623          | 11.500465          | 11.598560          |
| ## 36023_at   | 11.461717          | 10.785368          | 10.563032          |
| ## 191_at     | 9.997164           | 10.065955          | 9.550446           |
| ##            | CL2001011152AA.CEL |                    |                    |
| ## 907_at     | 11.246136          |                    |                    |
| ## 35430_at   | 9.414451           |                    |                    |
| ## 36841_at   | 9.218744           |                    |                    |
| ## 38924_s_at | 12.144874          |                    |                    |
| ## 36023_at   | 10.699175          |                    |                    |

## Step 2. Replace Affymetrix probeset ID with gene hgnc\_symbols as the row-names of the R data object “leukemia”.

As a demo, we run FAIME only with the first 4 samples.

If there are more than one rows of expression for the same gene, we recommend collapsing this gene into one row with the highest value (maximum) within the column for that gene. The Bioconductor package *WGCNA* provides several methods to select the row. In this demo, we use the first row for simplicity.

```
library(biomaRt)
ensembl = useMart("ensembl")
ensembl = useDataset("hsapiens_gene_ensembl",mart=ensembl)
ID_symbol <- getBM(attributes=c("affy_hg_u95a","hgnc_symbol"), filters = "affy_hg_u95a",
                  values = rownames(dat_exp), mart = ensembl)
ID_symbol<-ID_symbol[ID_symbol$hgnc_symbol!="",]
mdat <- as.data.frame(matrix(, nrow = 0, ncol = 2, byrow = TRUE,
                            dimnames = list(NULL,c("affy_hg_u95a", "hgnc_symbol"))))
for(i in 1:length(unique(ID_symbol$hgnc_symbol))){
  sub<-ID_symbol[ID_symbol$hgnc_symbol==unique(ID_symbol$hgnc_symbol)[i],]
  mdat<-rbind(mdat,sub[1,])
}
dat_exp$affy_hg_u95a<-rownames(dat_exp)
dat_exp_fil<-merge(dat_exp,mdat,by="affy_hg_u95a",all=F)
rownames(dat_exp_fil)<-dat_exp_fil$hgnc_symbol
dat_exp_fil<-dat_exp_fil[,2:5]
dim(dat_exp_fil)
## [1] 4449 4
head(dat_exp_fil)
##      CL2001011101AA.CEL CL2001011102AA.CEL CL2001011104AA.CEL
## MAPK3      11.354426      10.932543      11.185906
## TIE1       9.185470       8.823661       8.687186
## DUSP1     13.717107     14.469777     13.713944
## HINT1     12.683549     13.818987     13.233068
## DYRK4     9.205476     10.190301       9.117263
## YWHAE    10.323587      9.434503     11.261651
##      CL2001011105AA.CEL
## MAPK3      11.251631
## TIE1       8.958305
## DUSP1     13.415991
## HINT1     12.915500
## DYRK4     9.688376
## YWHAE     9.609229
```

## Step 3. Download the genesets data (*Msigdb* version 4, collection *c2.cgp*) from the website to local directory.

The users can find the MSigdb collection at: <http://www.broadinstitute.org/gsea/msigdb/collections.jsp>  
Please assign the parameter *mygmt* to your local directory before running the demo.

```
library(GSA)
mygmt<-"G:/projects/Share/MsigDB/c2.cgp.v4.0.symbols.gmt"
Msig<-GSA.read.gmt(mygmt)
```

Step 4. Run the function with the default parameter set.

```
res<-rungere2pathway(dat=dat_exp_fil,gsmmap=Msig)
## [1] "gene2pathay calculates score..... done"
head(res)
##
## CL2001011101AA.CEL2pathscore
## NAKAMURA_CANCER_MICROENVIRONMENT_UP -578.18675
## NAKAMURA_CANCER_MICROENVIRONMENT_DN -408.05464
## WEST_ADRENOCORTICAL_TUMOR_MARKERS_UP -91.37237
## WEST_ADRENOCORTICAL_TUMOR_MARKERS_DN 139.48609
## WINTER_HYPOXIA_UP 380.22178
## WINTER_HYPOXIA_DN 66.89387
##
## CL2001011102AA.CEL2pathscore
## NAKAMURA_CANCER_MICROENVIRONMENT_UP -469.66161
## NAKAMURA_CANCER_MICROENVIRONMENT_DN -384.09149
## WEST_ADRENOCORTICAL_TUMOR_MARKERS_UP -32.41900
## WEST_ADRENOCORTICAL_TUMOR_MARKERS_DN 182.15191
## WINTER_HYPOXIA_UP 529.62249
## WINTER_HYPOXIA_DN -24.69069
##
## CL2001011104AA.CEL2pathscore
## NAKAMURA_CANCER_MICROENVIRONMENT_UP -643.64627
## NAKAMURA_CANCER_MICROENVIRONMENT_DN -295.01335
## WEST_ADRENOCORTICAL_TUMOR_MARKERS_UP -132.99217
## WEST_ADRENOCORTICAL_TUMOR_MARKERS_DN 223.50142
## WINTER_HYPOXIA_UP 538.36660
## WINTER_HYPOXIA_DN 21.03335
##
## CL2001011105AA.CEL2pathscore
## NAKAMURA_CANCER_MICROENVIRONMENT_UP -450.80775
## NAKAMURA_CANCER_MICROENVIRONMENT_DN -427.75050
## WEST_ADRENOCORTICAL_TUMOR_MARKERS_UP 35.13746
## WEST_ADRENOCORTICAL_TUMOR_MARKERS_DN 349.43553
## WINTER_HYPOXIA_UP 322.19420
## WINTER_HYPOXIA_DN 18.64051
```

## Reference:

1. Yang X, Regan K, Huang Y, Zhang Q, Li J, Seiwert TY, Cohen EE, Xing HR, Lussier YA: Single sample expression-anchored mechanisms predict survival in head and neck cancer. PLoS Comput Biol 2012, 8(1):e1002350.
